# Supplementary material
Source: PubMed Central journal article supplement (PMC3278732)

**A**

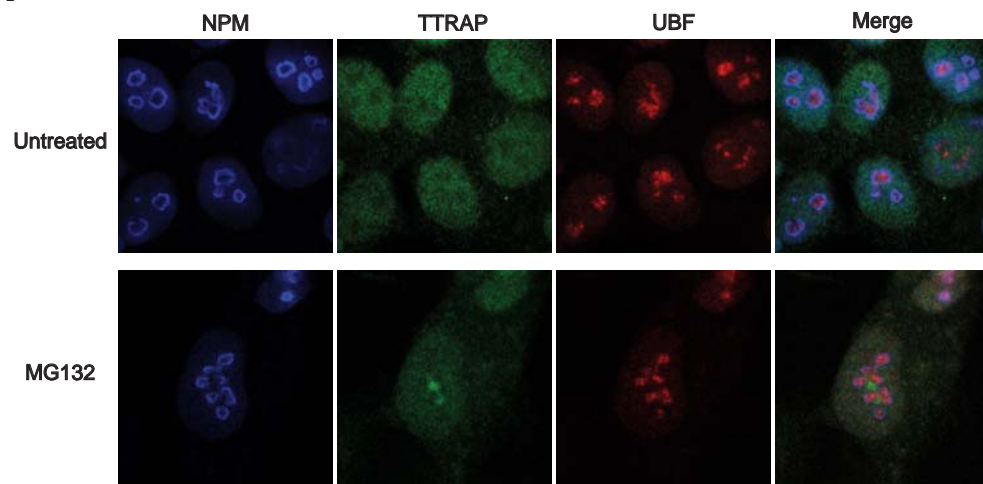

**B**

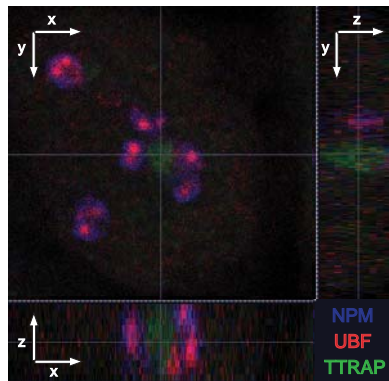

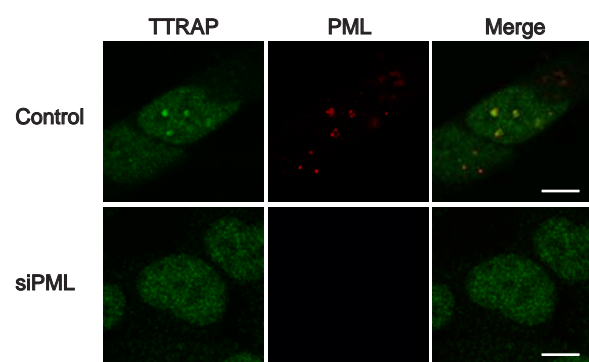

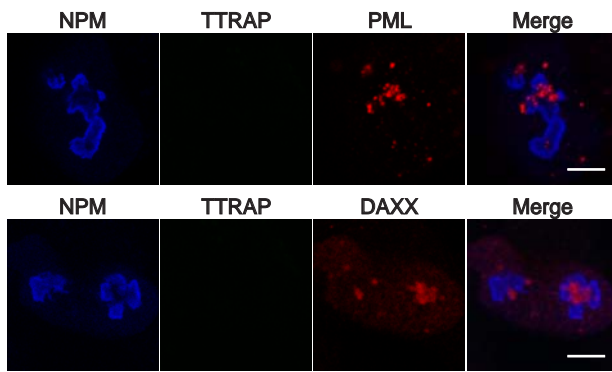

**A**

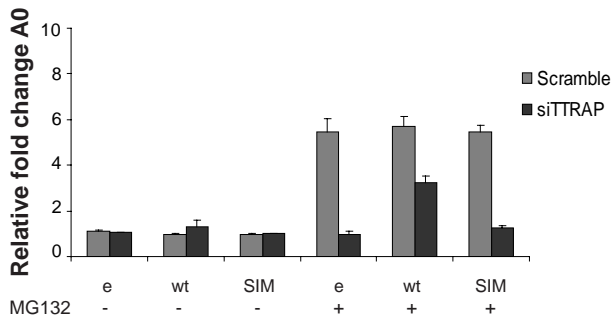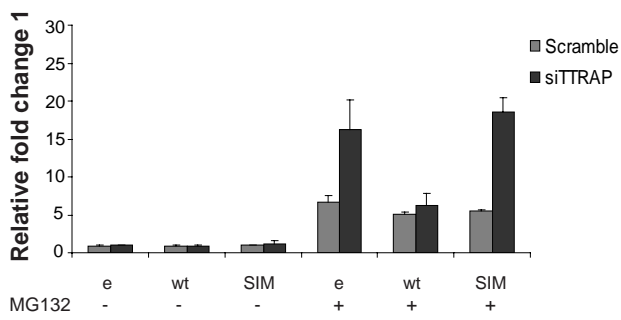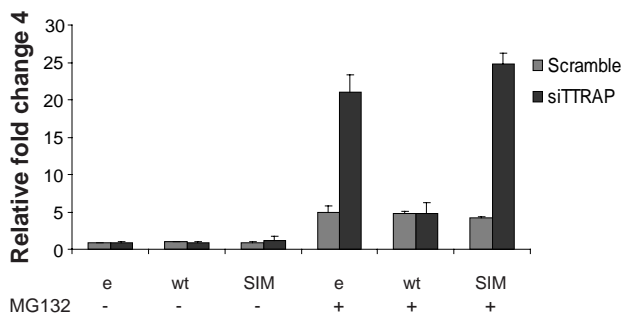

**B**

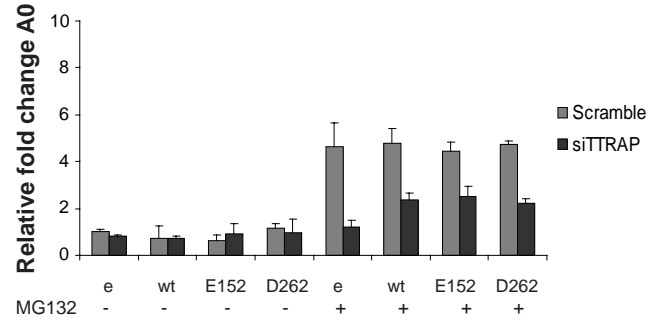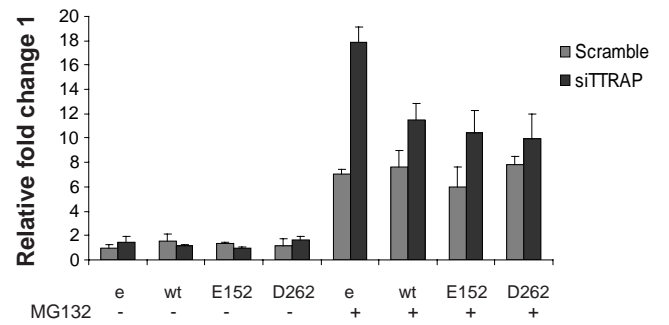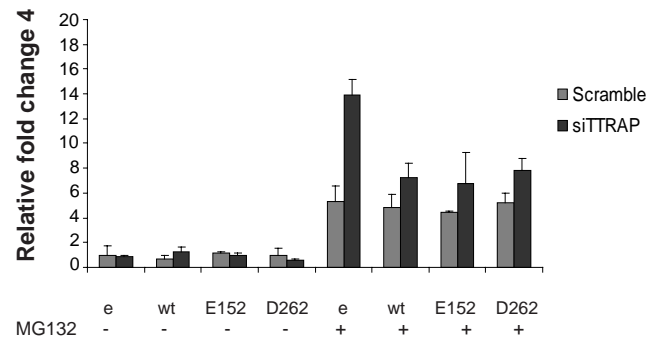

Supplement: cdd2011118x1.pdf [file cdd2011118x1.pdf]
